# Supplementary material for: In crystallo observation of three metal ion promoted DNA polymerase misincorporation
Source: PubMed Central journal article supplement (PMC9054841; doi:10.1038/s41467-022-30005-3), 2022-04-29
Supplement: 41467_2022_30005_MOESM1_ESM.pdf [file 41467_2022_30005_MOESM1_ESM.pdf]

# Supplementary Information

## ***In Crystallo* Observation of Three Metal Ion Promoted DNA Polymerase Misincorporation**

Caleb Chang<sup>1</sup>, Christie Lee Luo<sup>1</sup>, and Yang Gao<sup>1,\*</sup>

<sup>1</sup>Department of Biosciences, Rice University, Houston, Texas, 77005, USA

\*Correspondence: [yg60@rice.edu](mailto:yg60@rice.edu) , +1 (713) 348-2619

## Supplementary Figures

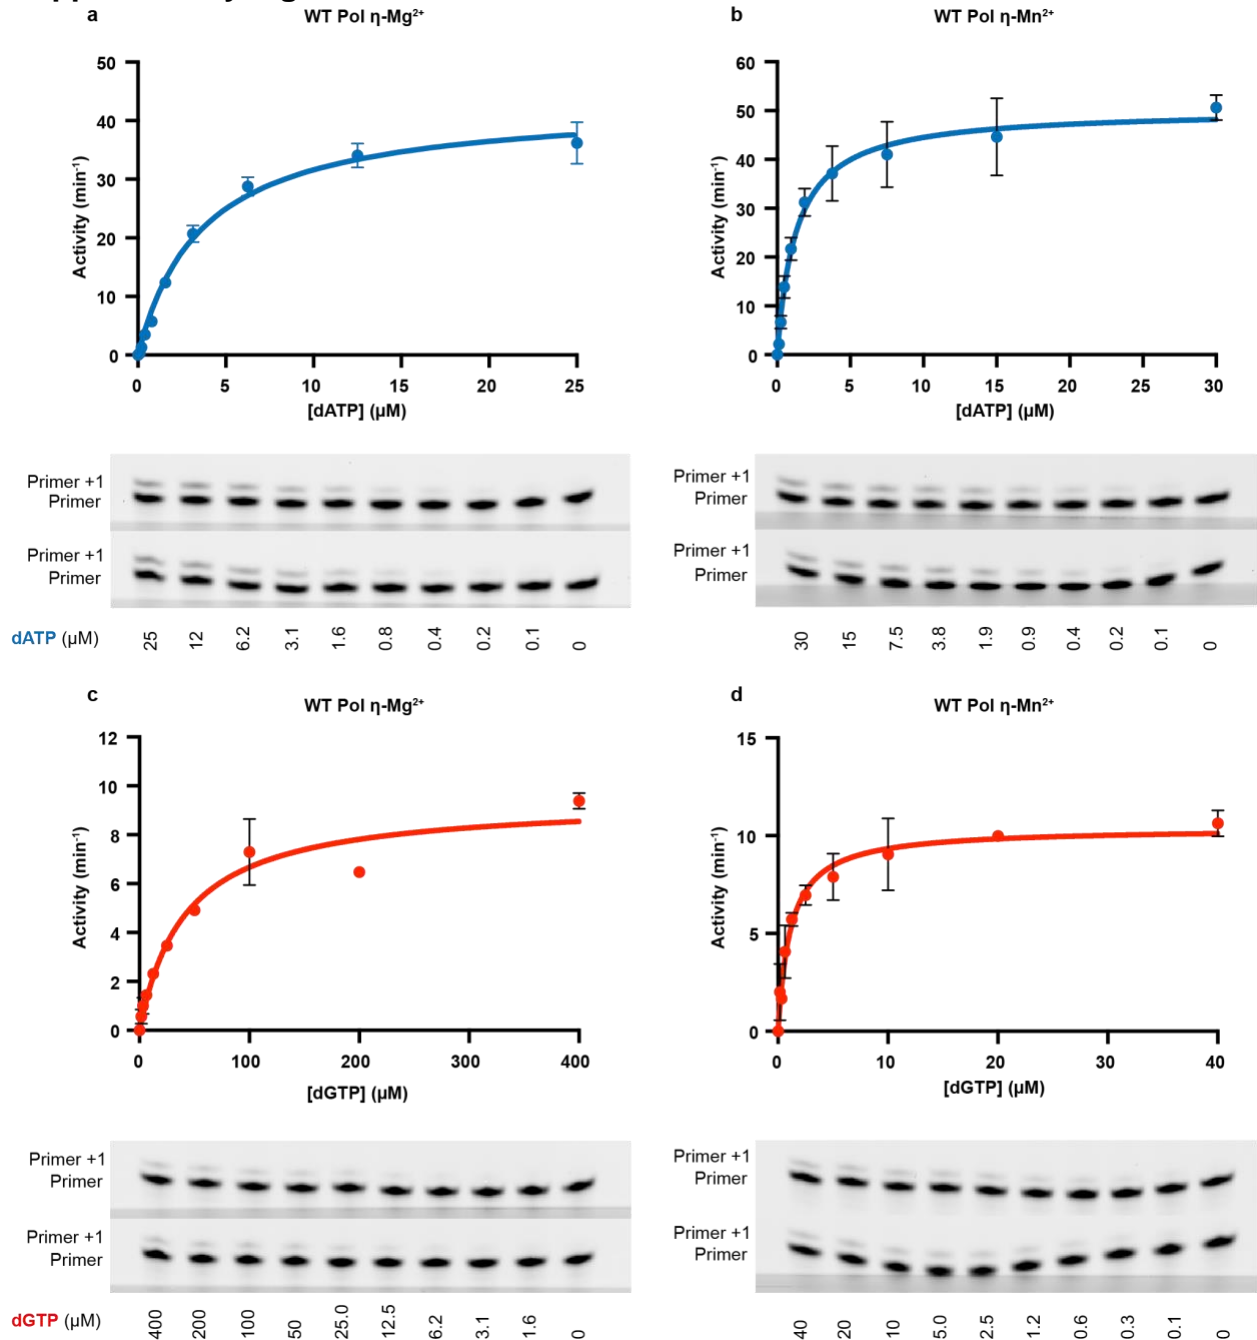

**Supplementary Fig. 1: Steady-state single-base nucleotide incorporation assays.** **a-b**, Steady-state single-base nucleotide incorporation assays of Pol  $\eta$  in the presence of 5 mM Mg<sup>2+</sup> for correct incorporation (**a**) and misincorporation (**b**). **c-d**, Steady-state single-base nucleotide incorporation assays of Pol  $\eta$  in the presence of 10 mM Mn<sup>2+</sup> for correct incorporation (**c**) and misincorporation (**d**). All data points are presented as mean values  $\pm$  standard deviation of duplicate measurements.

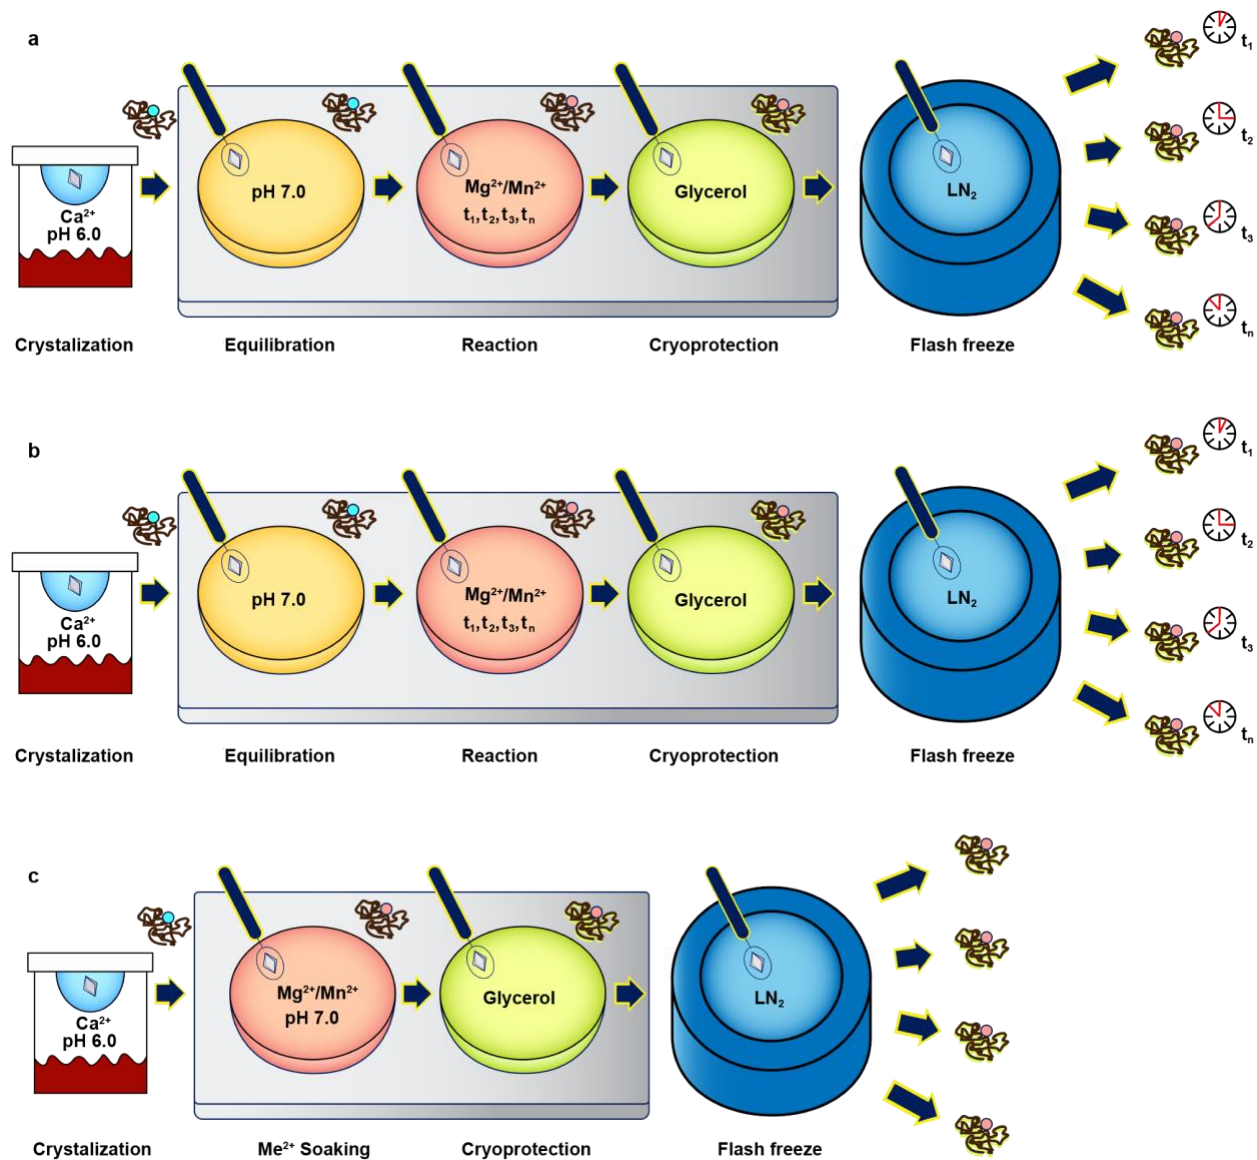

**Supplementary Fig. 2: Crystal soaking step-up.**

**a**, Pol  $\eta$  crystal soaking setup for the time-resolved reaction. **b**, Pol  $\eta$  crystal soaking setup for the two-step reaction. **c**, Pol  $\eta$  crystal soaking setup for  $\text{Me}^{2+}$  titration.

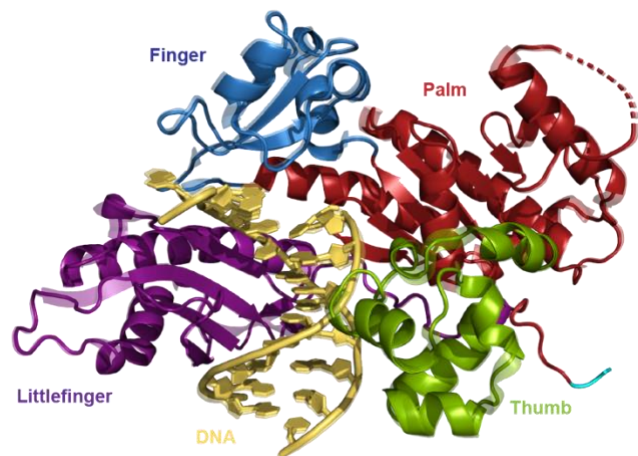

**Supplementary Fig. 3:** Superposition of correct versus incorrect nucleotide incorporation ternary complexes of Pol  $\eta$ . The DNA is colored in yellow. The palm, finger, thumb, and little finger domains are colored in red, blue, green, and purple, respectively. Faded structures represent the correct incorporation ternary complex.

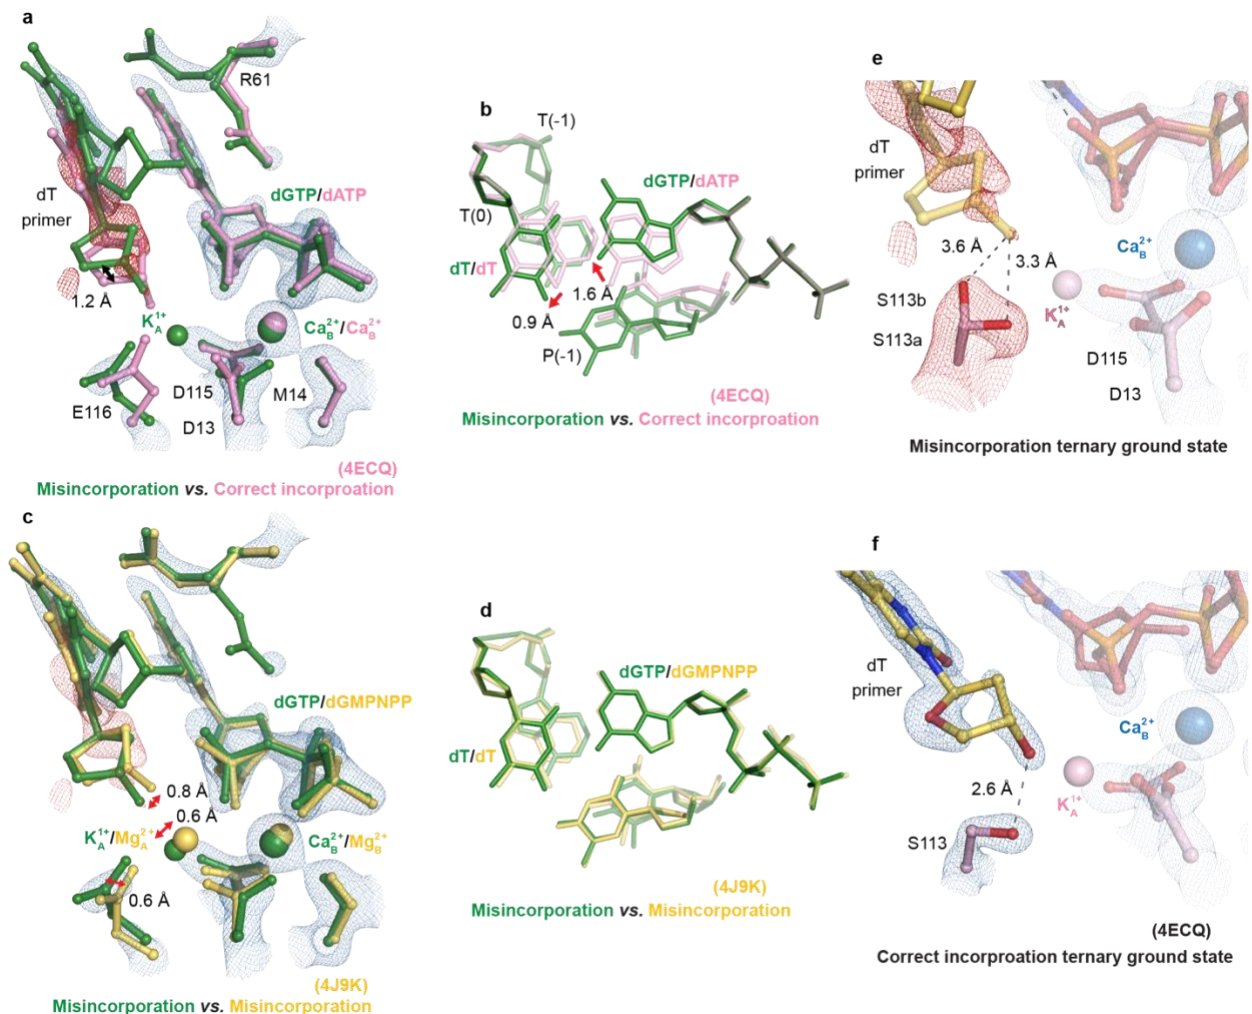

**Supplementary Fig. 4:** Structural comparison between ground states of correct nucleotide and incorrect nucleotide incorporation.

**a, b,** Structural comparison of incorrect dGTP:dT incorporation (pink) and correct dATP:dT nucleotide incorporation (4ECQ) (green) indicating the differences in 3'-OH alignment (**a**) and base-pairing (**b**). **c, d,** Structural overlay of misincorporation structures with dGMPNPP:dT base-pair (4J9K) (yellow) and the ternary ground state with dGTP:dT base-pair dGTP (green) indicating the differences in 3'-OH alignment (**c**) and base-pairing (**d**). **a-d,** All electron density maps apply to the molecule colored in green. **e, f,** Structure of mismatch (**e**) and matched (**f**) Pol η ground state complexed with  $\text{Ca}^{2+}$ . The  $2F_o - F_c$  map for everything including primer,  $\text{Me}^{2+}_A$  and  $\text{Me}^{2+}_B$  sites, dGTP, and catalytic residues and S113 in **f** (blue) was contoured at  $2\sigma$ . The  $F_o - F_c$  omit map for the down conformation of the primer and also S113 in **e** (red) was contoured at  $3\sigma$ .

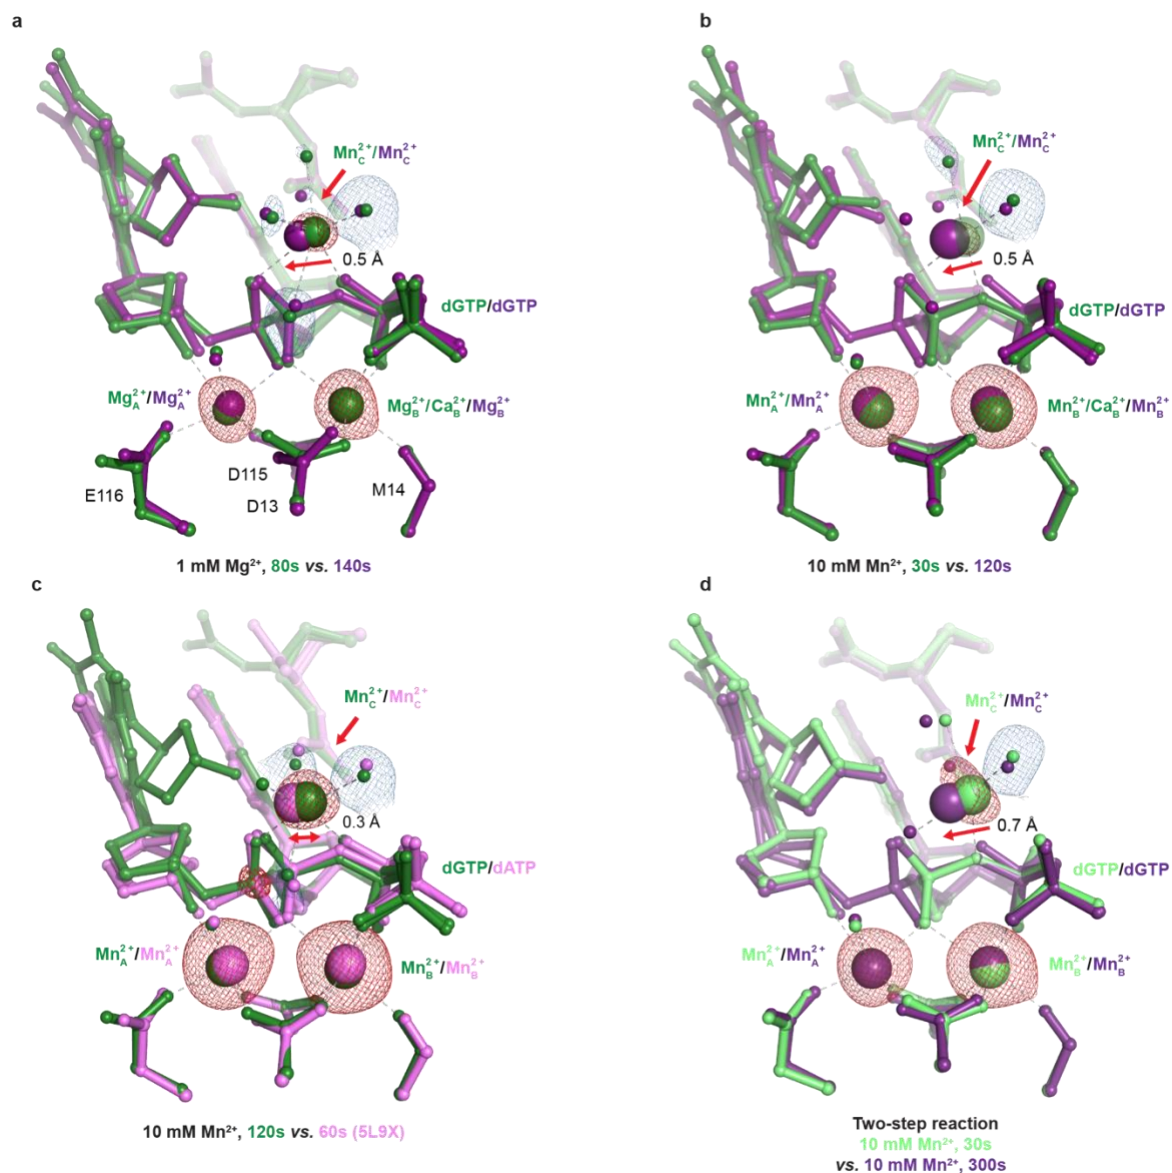

**Supplementary Fig. 5: Structural superposition of the  $Me^{2+}_C$ .**

All electron density maps apply to the molecule colored in green in **a-c** and lime green in **d**. The  $2F_o - F_c$  maps for all the coordinating water molecules (blue) were contoured at  $0.7 \sigma$ . The  $F_o - F_c$  omit map for the  $Me^{2+}_A$ ,  $Me^{2+}_B$ ,  $Me^{2+}_C$  and new bond density (red) was contoured at  $4 \sigma$  in **a, b, c** and  $3 \sigma$  in **d**.

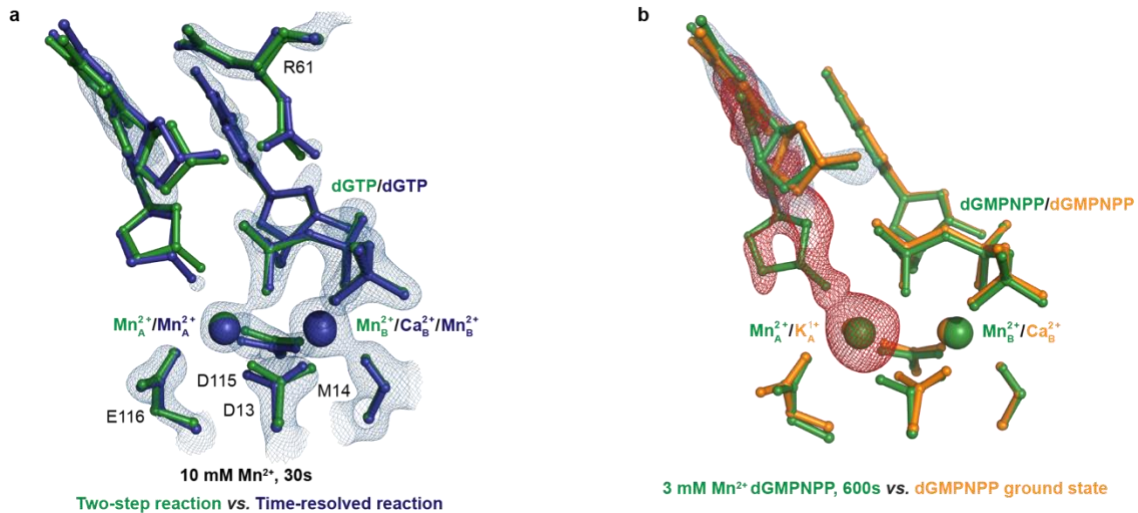

**Supplementary Fig. 6:** Structural superposition of reaction states and  $Me^{2+}_A$  *in crystallo* states.

**a**, Structural comparison between Pol  $\eta$ :dGTP in the two-step reaction (green) and Pol  $\eta$ :dGTP in the time-resolved reaction (navy). The  $2F_o-F_c$  map for the primer,  $Me^{2+}_A$ ,  $Me^{2+}_B$ , catalytic residues, and dGTP (blue) was contoured at  $2.0 \sigma$ . **b**, Structural comparison between Pol  $\eta$ :dGMPNPP soaked in 3 mM  $Mn^{2+}$  for 600s (green) and Pol  $\eta$ :dGMPNPP ground state (orange). The  $2F_o-F_c$  map for the primer up conformation (blue) was contoured at  $1.5 \sigma$ . The  $F_o-F_c$  omit map for both the  $Me^{2+}_A$  and primer down conformation (red) was contoured at  $3 \sigma$ . All electron density maps apply to the molecule colored in green.

## Supplementary Tables

### Supplementary Table 1: Crystal Diffraction and refinement data.

a Reaction with 1 mM Mg<sup>2+</sup>

|                                                     | GS (pH 7.0)           | 40s                   | 80s                   | 140s                  |
|-----------------------------------------------------|-----------------------|-----------------------|-----------------------|-----------------------|
| <b>PDB Code</b>                                     | <b>7U72</b>           | <b>7U77</b>           | <b>7U78</b>           | <b>7U79</b>           |
| <b>Data collection</b>                              |                       |                       |                       |                       |
| Wavelength (Å)                                      | 0.9787                | 0.9787                | 0.9787                | 0.9787                |
| Space group                                         | <i>P6<sub>1</sub></i> | <i>P6<sub>1</sub></i> | <i>P6<sub>1</sub></i> | <i>P6<sub>1</sub></i> |
| Cell dimensions                                     |                       |                       |                       |                       |
| <i>a, b, c</i> (Å)                                  | 97.91                 | 98.22                 | 97.74                 | 98.69                 |
|                                                     | 97.91                 | 98.22                 | 97.74                 | 98.69                 |
|                                                     | 81.70                 | 82.29                 | 81.76                 | 82.28                 |
| $\alpha, \beta, \gamma$ (°)                         | 90, 90, 120           | 90, 90, 120           | 90, 90, 120           | 90, 90, 120           |
| Resolution (Å) <sup>1</sup>                         | 37.6 - 1.53           | 37.8 - 1.58           | 42.0 - 1.6            | 42.3 - 1.69           |
|                                                     | (1.59 - 1.53)         | (1.64 - 1.58)         | (1.67 - 1.6)          | (1.75 - 1.69)         |
| R <sub>sym</sub> or R <sub>merge</sub> <sup>1</sup> | 0.0478 (1.26)         | 0.0496 (0.978)        | 0.0723 (1.79)         | 0.0811 (2.08)         |
| // $\sigma$ <sup>1</sup>                            | 23.8 (1.2)            | 26.4 (1.9)            | 19.8 (1.2)            | 20.2 (1.2)            |
| CC <sup>1/2</sup> <sup>1</sup>                      | 1 (0.48)              | 1 (0.65)              | 1 (0.41)              | 1 (0.48)              |
| Completeness (%)                                    | 99.9 (99.0)           | 99.1 (92.7)           | 99.9 (99.8)           | 99.8 (98.2)           |
| No. unique reflections <sup>1</sup>                 | 66926 (6570)          | 61140 (5732)          | 57410 (5710)          | 50554 (4956)          |
| <b>Refinement</b>                                   |                       |                       |                       |                       |
| Up primer occ.                                      | 0.85                  | 0.70                  | 0.75                  | 0.65                  |
| Down primer occ.                                    | 0.15                  | 0.30                  | -                     | 0.10                  |
| Up product occ.                                     | -                     | -                     | -                     | -                     |
| Down product occ.                                   | -                     | -                     | -                     | 0.25                  |
| A site occupancy                                    | 0.30 K <sup>1+</sup>  | 0.60 Mg <sup>2+</sup> | 0.75 Mg <sup>2+</sup> | 0.60 Mg <sup>2+</sup> |
| B site occupancy                                    | 0.80 Ca <sup>2+</sup> | 0.50 Ca <sup>2+</sup> | 0.30 Ca <sup>2+</sup> | 1.00 Mg <sup>2+</sup> |
|                                                     |                       | 0.50 Mg <sup>2+</sup> | 0.70 Mg <sup>2+</sup> |                       |
| C site occupancy                                    | -                     | -                     | 0.15 Mg <sup>2+</sup> | 0.35 Mg <sup>2+</sup> |
| dGTP occupancy                                      | 0.80                  | 0.85                  | 0.85                  | 0.60                  |
| Product formation                                   | -                     | -                     | -                     | 0.25                  |
| <b>B-factors</b>                                    |                       |                       |                       |                       |
| Me <sub>A</sub> /Lig <sub>A</sub> <sup>2</sup>      | 29.1/33.7             | 25.0/32.4             | 26.4/33.3             | 29.4/35.2             |
| Me <sub>B</sub> /Lig <sub>B</sub> <sup>2</sup>      | 24.2/26.7             | 20.7/24.9             | 21.6/26.8             | 18.4/27.1             |
| Me <sub>C</sub> /Lig <sub>C</sub> <sup>2</sup>      | -/-                   | -/-                   | 26.9/30.2             | 29.4/35.4             |
| Resolution (Å)                                      | 1.53                  | 1.58                  | 1.60                  | 1.70                  |
| No. reflections                                     | 66924 (6570)          | 61136 (5732)          | 57405 (5709)          | 50057 (4997)          |
| R <sub>work</sub> /R <sub>free</sub>                | 0.19/0.22             | 0.18/0.20             | 0.19/0.22             | 0.18/0.22             |
| Wilson B                                            | 24.6                  | 24.1                  | 24.5                  | 27.8                  |
| <b>Ramachandran</b>                                 |                       |                       |                       |                       |
| Favored (%)                                         | 97.0                  | 97.9                  | 97.9                  | 97.7                  |
| Outlier (%)                                         | 0                     | 0                     | 0.47                  | 0.47                  |
| <b>R.m.s. deviations</b>                            |                       |                       |                       |                       |
| Bond lengths (Å)                                    | 0.009                 | 0.009                 | 0.009                 | 0.01                  |
| Bond angles (°)                                     | 1.2                   | 1.2                   | 1.2                   | 1.1                   |

<sup>1</sup>Data in the highest resolution shell is shown in the parenthesis.

<sup>2</sup>B-factor of metal ions and their protein nucleotide ligands.



|                                                     | 200s                  | 250s                  | 300s                  |
|-----------------------------------------------------|-----------------------|-----------------------|-----------------------|
| <b>PDB Code</b>                                     | <b>7U7A</b>           | <b>7U7B</b>           | <b>7U7C</b>           |
| <b>Data collection</b>                              |                       |                       |                       |
| Wavelength (Å)                                      | 0.9787                | 0.9787                | 0.9787                |
| Space group                                         | <i>P6<sub>1</sub></i> | <i>P6<sub>1</sub></i> | <i>P6<sub>1</sub></i> |
| Cell dimensions                                     |                       |                       |                       |
| <i>a, b, c</i> (Å)                                  | 97.92                 | 98.08                 | 98.34                 |
|                                                     | 97.92                 | 98.08                 | 98.34                 |
|                                                     | 81.67                 | 81.94                 | 82.20                 |
| $\alpha, \beta, \gamma$ (°)                         | 90, 90, 120           | 90, 90, 120           | 90, 90, 120           |
| Resolution (Å) <sup>1</sup>                         | 37.6 - 1.58           | 37.7 - 1.61           | 42.2 - 1.55           |
|                                                     | (1.64 - 1.58)         | (1.67 - 1.61)         | (1.61 - 1.55)         |
| R <sub>sym</sub> or R <sub>merge</sub> <sup>1</sup> | 0.0839 (1.81)         | 0.0472 (0.529)        | 0.0453 (0.721)        |
| <i>I</i> / $\sigma$ <i>I</i>                        | 20.6 (1.1)            | 27.2 (3.7)            | 27.6 (2.4)            |
| CC <sup>1/2</sup> <sup>1</sup>                      | 1 (0.41)              | 1 (0.89)              | 1 (0.79)              |
| Completeness (%)                                    | 99.9 (99.8)           | 99.3 (96.2)           | 99.0 (90.9)           |
| No. unique reflections <sup>1</sup>                 | 60848 (6035)          | 57668 (5559)          | 64707 (5909)          |
| <b>Refinement</b>                                   |                       |                       |                       |
| Up primer occ.                                      | 0.60                  | 0.60                  | 0.50                  |
| Down primer occ.                                    | 0.10                  | 0.00                  | 0.05                  |
| Up product occ.                                     | -                     | -                     | -                     |
| Down product occ.                                   | 0.35                  | 0.40                  | 0.45                  |
| A site occupancy                                    | 0.60 Mg <sup>2+</sup> | 0.55 Mg <sup>2+</sup> | 0.50 Mg <sup>2+</sup> |
| B site occupancy                                    | 0.90 Mg <sup>2+</sup> | 1.00 Mg <sup>2+</sup> | 1.00 Mg <sup>2+</sup> |
| C site occupancy                                    | 0.45 Mg <sup>2+</sup> | 0.55 Mg <sup>2+</sup> | 0.60 Mg <sup>2+</sup> |
| dGTP occupancy                                      | 0.40                  | 0.35                  | 0.30                  |
| Product formation                                   | 0.35                  | 0.40                  | 0.45                  |
| <b>B-factors</b>                                    |                       |                       |                       |
| Me <sub>A</sub> /Lig <sub>A</sub> <sup>2</sup>      | 26.8/31.7             | 26.6/30.9             | 24.3/29.1             |
| Me <sub>B</sub> /Lig <sub>B</sub> <sup>2</sup>      | 17.6/25.0             | 17.3/25.3             | 16.5/22.2             |
| Me <sub>C</sub> /Lig <sub>C</sub> <sup>2</sup>      | 27.9/30.8             | 32.2/26.6             | 32.7/25.9             |
| Resolution (Å)                                      | 1.58                  | 1.61                  | 1.55                  |
| No. reflections                                     | 60843 (6030)          | 57625 (5559)          | 64706 (5909)          |
| R <sub>work</sub> /R <sub>free</sub>                | 0.19/0.22             | 0.18/0.20             | 0.18/0.21             |
| Wilson B                                            | 21.7                  | 21.7                  | 20.8                  |
| <b>Ramachandran</b>                                 |                       |                       |                       |
| Favored (%)                                         | 97.9                  | 97.9                  | 97.9                  |
| Outlier (%)                                         | 0                     | 0                     | 0                     |
| <b>R.m.s. deviations</b>                            |                       |                       |                       |
| Bond lengths (Å)                                    | 0.009                 | 0.008                 | 0.008                 |
| Bond angles (°)                                     | 1.1                   | 1.1                   | 1.1                   |

<sup>1</sup>Data in the highest resolution shell is shown in the parenthesis.

<sup>2</sup>B-factor of metal ions and their protein nucleotide ligands.

**b** Reaction with 10 mM Mn<sup>2+</sup>

|                                                     | 30s                                            | 60s                   | 90s                   | 120s                  |
|-----------------------------------------------------|------------------------------------------------|-----------------------|-----------------------|-----------------------|
| <b>PDB Code</b>                                     | <b>7U7D</b>                                    | <b>7U7E</b>           | <b>7U7F</b>           | <b>7U7G</b>           |
| <b>Data collection</b>                              |                                                |                       |                       |                       |
| Wavelength (Å)                                      | 0.9787                                         | 0.9787                | 0.9787                | 0.9787                |
| Space group                                         | <i>P6<sub>1</sub></i>                          | <i>P6<sub>1</sub></i> | <i>P6<sub>1</sub></i> | <i>P6<sub>1</sub></i> |
| Cell dimensions                                     |                                                |                       |                       |                       |
| <i>a</i> , <i>b</i> , <i>c</i> (Å)                  | 98.08                                          | 98.00                 | 98.27                 | 97.79                 |
|                                                     | 98.08                                          | 98.00                 | 98.27                 | 97.79                 |
|                                                     | 82.35                                          | 81.94                 | 81.98                 | 82.08                 |
| $\alpha$ , $\beta$ , $\gamma$ (°)                   | 90, 90, 120                                    | 90, 90, 120           | 90, 90, 120           | 90, 90, 120           |
| Resolution (Å) <sup>1</sup>                         | 37.8 - 1.57                                    | 37.7 - 1.58           | 42.2 - 1.65           | 42.4 - 1.77           |
|                                                     | (1.63 - 1.57)                                  | (1.64 - 1.58)         | (1.71 - 1.65)         | (1.83 - 1.77)         |
| R <sub>sym</sub> or R <sub>merge</sub> <sup>1</sup> | 0.0548 (1.07)                                  | 0.0789 (1.57)         | 0.07 (1.52)           | 0.096 (1.90)          |
| // $\sigma$ <sup>1</sup>                            | 23.8 (1.6)                                     | 19.6 (1.4)            | 22.3 (1.4)            | 18.6 (1.3)            |
| CC <sup>1/2</sup> <sup>1</sup>                      | 1 (0.61)                                       | 1 (0.49)              | 1 (0.59)              | 1 (0.56)              |
| Completeness (%)                                    | 99.9 (99.9)                                    | 99.9 (99.8)           | 98.9 (98.8)           | 99.99 (100)           |
| No. unique reflections <sup>1</sup>                 | 62764 (6249)                                   | 61140 (6061)          | 53875 (5300)          | 43468 (4302)          |
| <b>Refinement</b>                                   |                                                |                       |                       |                       |
| Up primer occ.                                      | 0.60                                           | 0.60                  | 0.65                  | 0.50                  |
| Down primer occ.                                    | 0.40                                           | 0.40                  | 0.15                  | 0.25                  |
| Up product occ.                                     | -                                              | -                     | 0.10                  | 0.10                  |
| Down product occ.                                   | -                                              | -                     | 0.10                  | 0.15                  |
| A site occupancy                                    | 0.65 Mn <sup>2+</sup>                          | 0.70 Mn <sup>2+</sup> | 0.80 Mn <sup>2+</sup> | 0.80 Mn <sup>2+</sup> |
| B site occupancy                                    | 0.20 Ca <sup>2+</sup><br>0.80 Mn <sup>2+</sup> | 0.90 Mn <sup>2+</sup> | 0.85 Mn <sup>2+</sup> | 0.90 Mn <sup>2+</sup> |
| C site occupancy                                    | 0.10 Mn <sup>2+</sup>                          | 0.13 Mn <sup>2+</sup> | 0.15 Mn <sup>2+</sup> | 0.18 Mn <sup>2+</sup> |
| dGTP occupancy                                      | 0.80                                           | 0.80                  | 0.60                  | 0.55                  |
| Product formation                                   | -                                              | 0.00                  | 0.20                  | 0.25                  |
| <b>B-factors</b>                                    |                                                |                       |                       |                       |
| Me <sub>A</sub> /Lig <sub>A</sub> <sup>2</sup>      | 22.7/29.5                                      | 23.1/30.2             | 28.4/30.6             | 28.6/30.3             |
| Me <sub>B</sub> /Lig <sub>B</sub> <sup>2</sup>      | 21.9/24.2                                      | 22.4/24.8             | 23.8/25.7             | 27.7/27.4             |
| Me <sub>C</sub> /Lig <sub>C</sub> <sup>2</sup>      | 25.0/32.7                                      | 29.1/28.4             | 27.6/31.6             | 29.9/35.2             |
| Resolution (Å)                                      | 1.57                                           | 1.58                  | 1.65                  | 1.77                  |
| No. reflections                                     | 62761 (6249)                                   | 61136 (6059)          | 53321 (5300)          | 43467 (4302)          |
| R <sub>work</sub> /R <sub>free</sub>                | 0.18/0.22                                      | 0.18/0.22             | 0.20/0.25             | 0.18/0.21             |
| Wilson B                                            | 23.3                                           | 22.8                  | 26.7                  | 30.0                  |
| <b>Ramachandran</b>                                 |                                                |                       |                       |                       |
| Favored (%)                                         | 97.9                                           | 97.0                  | 96.5                  | 97.2                  |
| Outlier (%)                                         | 0.23                                           | 0                     | 0.47                  | 0.23                  |
| <b>R.m.s. deviations</b>                            |                                                |                       |                       |                       |
| Bond lengths (Å)                                    | 0.008                                          | 0.008                 | 0.009                 | 0.009                 |
| Bond angles (°)                                     | 1.1                                            | 1.2                   | 1.2                   | 1.2                   |

<sup>1</sup>Data in the highest resolution shell is shown in the parenthesis.<sup>2</sup>B-factor of metal ions and their protein nucleotide ligands.

|                                                     | 180s                  | 300s                  | 600s                  |
|-----------------------------------------------------|-----------------------|-----------------------|-----------------------|
| <b>PDB Code</b>                                     | <b>7U7I</b>           | <b>7U7J</b>           | <b>7U7K</b>           |
| <b>Data collection</b>                              |                       |                       |                       |
| Wavelength (Å)                                      | 0.9787                | 0.9787                | 0.9787                |
| Space group                                         | <i>P6<sub>1</sub></i> | <i>P6<sub>1</sub></i> | <i>P6<sub>1</sub></i> |
| Cell dimensions                                     |                       |                       |                       |
| <i>a, b, c</i> (Å)                                  | 98.07                 | 98.25                 | 97.78                 |
|                                                     | 98.07                 | 98.25                 | 97.78                 |
|                                                     | 81.81                 | 82.16                 | 81.67                 |
| $\alpha, \beta, \gamma$ (°)                         | 90, 90, 120           | 90, 90, 120           | 90, 90, 120           |
| Resolution (Å) <sup>1</sup>                         | 37.7 - 1.57           | 37.8 - 1.58           | 41.9 - 1.67           |
|                                                     | (1.63 - 1.57)         | (1.64 - 1.58)         | (1.73 - 1.67)         |
| R <sub>sym</sub> or R <sub>merge</sub> <sup>1</sup> | 0.0546 (1.22)         | 0.0555 (1.14)         | 0.0906 (1.83)         |
| // $\sigma$ <sup>1</sup>                            | 25.0 (1.4)            | 23.6 (1.7)            | 20.9 (1.3)            |
| CC <sup>1/2</sup> <sup>1</sup>                      | 1 (0.51)              | 1 (0.64)              | 1 (0.41)              |
| Completeness (%)                                    | 99.9 (98.9)           | 99.9 (98.8)           | 99.9 (99.3)           |
| No. unique reflections <sup>1</sup>                 | 62189 (6110)          | 61301 (6041)          | 51427 (5091)          |
| <b>Refinement</b>                                   |                       |                       |                       |
| Up primer occ.                                      | 0.45                  | 0.40                  | 0.35                  |
| Down primer occ.                                    | 0.20                  | 0.20                  | 0.15                  |
| Up product occ.                                     | 0.15                  | 0.15                  | 0.20                  |
| Down product occ.                                   | 0.20                  | 0.25                  | 0.30                  |
| A site occupancy                                    | 0.70 Mn <sup>2+</sup> | 0.70 Mn <sup>2+</sup> | 0.65 Mn <sup>2+</sup> |
| B site occupancy                                    | 0.90 Mn <sup>2+</sup> | 0.90 Mn <sup>2+</sup> | 0.90 Mn <sup>2+</sup> |
| C site occupancy                                    | 0.20 Mn <sup>2+</sup> | 0.25 Mn <sup>2+</sup> | 0.30 Mn <sup>2+</sup> |
| dGTP occupancy                                      | 0.45                  | 0.40                  | 0.30                  |
| Product formation                                   | 0.30                  | 0.40                  | 0.45                  |
| <b>B-factors</b>                                    |                       |                       |                       |
| Me <sub>A</sub> /Lig <sub>A</sub> <sup>2</sup>      | 21.3/27.9             | 19.7/27.2             | 24.1/28.1             |
| Me <sub>B</sub> /Lig <sub>B</sub> <sup>2</sup>      | 20.4/22.5             | 19.3/21.7             | 24.7/25.3             |
| Me <sub>C</sub> /Lig <sub>C</sub> <sup>2</sup>      | 23.7/31.2             | 25.4/35.5             | 32.5/36.1             |
| Resolution (Å)                                      | 1.57                  | 1.58                  | 1.67                  |
| No. reflections                                     | 62183 (6109)          | 61295 (6041)          | 51420 (5086)          |
| R <sub>work</sub> /R <sub>free</sub>                | 0.18/0.22             | 0.18/0.21             | 0.18/0.22             |
| Wilson B                                            | 23.7                  | 23.0                  | 26.8                  |
| <b>Ramachandran</b>                                 |                       |                       |                       |
| Favored (%)                                         | 97.4                  | 97.0                  | 97.2                  |
| Outlier (%)                                         | 0                     | 0.23                  | 0                     |
| <b>R.m.s. deviations</b>                            |                       |                       |                       |
| Bond lengths (Å)                                    | 0.009                 | 0.009                 | 0.009                 |
| Bond angles (°)                                     | 1.2                   | 1.2                   | 1.2                   |

<sup>1</sup>Data in the highest resolution shell is shown in the parenthesis.

<sup>2</sup>B-factor of metal ions and their protein nucleotide ligands.

**c 1 mM Mg<sup>2+</sup> 300s with alternative product**

|                                                     | 1                     | 2                     | 3                     |
|-----------------------------------------------------|-----------------------|-----------------------|-----------------------|
| <b>PDB Code</b>                                     | <b>7U7L</b>           | -                     | -                     |
| <b>Data collection</b>                              |                       |                       |                       |
| Wavelength (Å)                                      | 0.9787                | 0.9787                | 0.9787                |
| Space group                                         | <i>P6<sub>1</sub></i> | <i>P6<sub>1</sub></i> | <i>P6<sub>1</sub></i> |
| Cell dimensions                                     |                       |                       |                       |
| <i>a, b, c</i> (Å)                                  | 98.16                 | 98.44                 | 98.24                 |
|                                                     | 98.16                 | 98.44                 | 98.24                 |
|                                                     | 81.88                 | 82.13                 | 81.94                 |
| $\alpha, \beta, \gamma$ (°)                         | 90, 90, 120           | 90, 90, 120           | 90, 90, 120           |
| Resolution (Å) <sup>1</sup>                         | 42.1 - 1.47           | 42.6 - 1.5            | 42.5 - 1.7            |
|                                                     | (1.52 - 1.47)         | (1.55 - 1.5)          | (1.76 - 1.7)          |
| R <sub>sym</sub> or R <sub>merge</sub> <sup>1</sup> | 0.053 (0.783)         | 0.0445 (0.851)        | 0.0499 (0.547)        |
| <i>I</i> / $\sigma$ <sup>1</sup>                    | 23.1 (1.5)            | 25.5 (1.6)            | 28.8 (2.8)            |
| CC <sup>1/2</sup> <sup>1</sup>                      | 1 (0.57)              | 1 (0.48)              | 1 (0.82)              |
| Completeness (%)                                    | 99.9 (98.8)           | 99.5 (95.6)           | 99.3 (93.3)           |
| No. unique reflections <sup>1</sup>                 | 75880 (7444)          | 71910 (6879)          | 49060 (4559)          |
| <b>Refinement</b>                                   |                       |                       |                       |
| Product occ.                                        | 0.30                  | 0.20                  | 0.20                  |
| Alternative product occupancy                       | 0.70                  | 0.80                  | 0.80                  |
| Resolution (Å)                                      | 1.47                  | 1.50                  | 1.70                  |
| No. reflections                                     | 75876 (7444)          | 71899 (6871)          | 49057 (4559)          |
| R <sub>work</sub> /R <sub>free</sub>                | 0.19/0.22             | 0.18/0.21             | 0.18/0.21             |
| Wilson B                                            | 19.9                  | 21.0                  | 22.2                  |
| Ramachandran                                        |                       |                       |                       |
| Favored (%)                                         | 97.6                  | 97.4                  | 97.4                  |
| Outlier (%)                                         | 0                     | 0.24                  | 0.24                  |
| R.m.s. deviations                                   |                       |                       |                       |
| Bond lengths (Å)                                    | 0.008                 | 0.008                 | 0.008                 |
| Bond angles (°)                                     | 1.1                   | 1.1                   | 1.1                   |

<sup>1</sup>Data in the highest resolution shell is shown in the parenthesis.

<sup>2</sup>B-factor of metal ions and their protein nucleotide ligands.

**d** Two-step reaction with 10 mM Mn<sup>2+</sup>

|                                                     | 0s                    | 30s                   | 90s                   | 300s                  |
|-----------------------------------------------------|-----------------------|-----------------------|-----------------------|-----------------------|
| <b>PDB Code</b>                                     | <b>7U73</b>           | <b>7U74</b>           | <b>7U75</b>           | <b>7U76</b>           |
| <b>Data collection</b>                              |                       |                       |                       |                       |
| Wavelength (Å)                                      | 0.9786                | 0.9786                | 0.9786                | 0.9787                |
| Space group                                         | <i>P6<sub>1</sub></i> | <i>P6<sub>1</sub></i> | <i>P6<sub>1</sub></i> | <i>P6<sub>1</sub></i> |
| Cell dimensions                                     |                       |                       |                       |                       |
| <i>a, b, c</i> (Å)                                  | 98.15                 | 98.68                 | 98.62                 | 97.66                 |
|                                                     | 98.15                 | 98.68                 | 98.62                 | 97.66                 |
|                                                     | 82.10                 | 82.21                 | 82.06                 | 81.44                 |
| $\alpha, \beta, \gamma$ (°)                         | 90, 90, 120           | 90, 90, 120           | 90, 90, 120           | 90, 90, 120           |
| Resolution (Å) <sup>1</sup>                         | 42.1 - 1.56           | 32.3 - 1.52           | 37.9 - 1.55           | 42.3 - 1.69           |
|                                                     | (1.61 - 1.56)         | (1.57 - 1.52)         | (1.61 - 1.55)         | (1.75 - 1.69)         |
| R <sub>sym</sub> or R <sub>merge</sub> <sup>1</sup> | 0.0673 (1.67)         | 0.0406 (0.841)        | 0.0506 (0.921)        | 0.0609 (1.72)         |
| // $\sigma$ <sup>1</sup>                            | 29.4 (1.5)            | 31.1 (1.9)            | 23.8 (1.6)            | 19.7 (1.4)            |
| CC <sup>1/2</sup> <sup>1</sup>                      | 1 (0.61)              | 1 (0.78)              | 1 (0.63)              | 1 (0.59)              |
| Completeness (%)                                    | 100 (100)             | 99.9 (98.8)           | 99.6 (96.7)           | 99.99 (100)           |
| No. unique reflections <sup>1</sup>                 | 63845 (6321)          | 69770 (6867)          | 65466 (6351)          | 49390 (4886)          |
| <b>Refinement</b>                                   |                       |                       |                       |                       |
| Up primer occ.                                      | 0.85                  | 0.60                  | 0.65                  | 0.50                  |
| Down primer occ.                                    | 0.15                  | 0.40                  | 0.35                  | 0.15                  |
| Up product occ.                                     | -                     | -                     | -                     | 0.20                  |
| Down product occ.                                   | -                     | -                     | -                     | 0.15                  |
| A site occupancy                                    | 0.80 Mn <sup>2+</sup> | 0.50 Mn <sup>2+</sup> | 0.40 Mn <sup>2+</sup> | 0.50 Mn <sup>2+</sup> |
| B site occupancy                                    | 0.85 Mn <sup>2+</sup> | 0.80 Mn <sup>2+</sup> | 0.75 Mn <sup>2+</sup> | 0.75 Mn <sup>2+</sup> |
| C site occupancy                                    | -                     | 0.10 Mn <sup>2+</sup> | 0.20 Mn <sup>2+</sup> | 0.20 Mn <sup>2+</sup> |
| dGTP occupancy                                      | 0.80                  | 0.70                  | 0.75                  | 0.35                  |
| Product formation                                   | -                     | -                     | -                     | 0.35                  |
| <b>B-factors</b>                                    |                       |                       |                       |                       |
| Me <sub>A</sub> /Lig <sub>A</sub> <sup>2</sup>      | 21.6/25.0             | 24.5/33.3             | 22.6/33.4             | 28.7/35.5             |
| Me <sub>B</sub> /Lig <sub>B</sub> <sup>2</sup>      | 18.2/21.7             | 22.7/24.9             | 23.1/27.8             | 25.7/28.3             |
| Me <sub>C</sub> /Lig <sub>C</sub> <sup>2</sup>      | -                     | 30.28/36.6            | 36.5/38.8             | 35.44/40.8            |
| Resolution (Å)                                      | 1.56                  | 1.52                  | 1.55                  | 1.69                  |
| No. reflections                                     | 63842 (6321)          | 69756 (6860)          | 65464 (6351)          | 49388 (4886)          |
| R <sub>work</sub> /R <sub>free</sub>                | 0.18/0.21             | 0.19/0.22             | 0.19/0.22             | 0.18/0.22             |
| Wilson B                                            | 23.5                  | 22.9                  | 24.4                  | 29.8                  |
| <b>Ramachandran</b>                                 |                       |                       |                       |                       |
| Favored (%)                                         | 97.9                  | 98.1                  | 97.7                  | 97.2                  |
| Outlier (%)                                         | 0                     | 0                     | 0.23                  | 0.24                  |
| <b>R.m.s. deviations</b>                            |                       |                       |                       |                       |
| Bond lengths (Å)                                    | 0.009                 | 0.008                 | 0.009                 | 0.011                 |
| Bond angles (°)                                     | 1.2                   | 1.1                   | 1.2                   | 1.3                   |

<sup>1</sup>Data in the highest resolution shell is shown in the parenthesis.

<sup>2</sup>B-factor of metal ions and their protein nucleotide ligands.

**e** A-site titration with Mg<sup>2+</sup>

|                                                     | none                  | 0.025                 | 0.05                  | 0.1                   |
|-----------------------------------------------------|-----------------------|-----------------------|-----------------------|-----------------------|
| <b>PDB Code</b>                                     | <b>7U7R</b>           | <b>7U7S</b>           | <b>7U7T</b>           | <b>7U7U</b>           |
| <b>Data collection</b>                              |                       |                       |                       |                       |
| Wavelength (Å)                                      | 0.9786                | 0.9786                | 0.9786                | 0.9786                |
| Space group                                         | <i>P6<sub>1</sub></i> | <i>P6<sub>1</sub></i> | <i>P6<sub>1</sub></i> | <i>P6<sub>1</sub></i> |
| Cell dimensions                                     |                       |                       |                       |                       |
| <i>a</i> , <i>b</i> , <i>c</i> (Å)                  | 97.99                 | 98.45                 | 98.63                 | 98.49                 |
|                                                     | 97.99                 | 98.45                 | 98.63                 | 98.49                 |
|                                                     | 81.61                 | 82.20                 | 81.97                 | 82.05                 |
| $\alpha$ , $\beta$ , $\gamma$ (°)                   | 90, 90, 120           | 90, 90, 120           | 90, 90, 120           | 90, 90, 120           |
| Resolution (Å) <sup>1</sup>                         | 28.3 - 1.64           | 37.8 - 1.6            | 42.7 - 1.55           | 32.2 - 1.54           |
|                                                     | (1.70 - 1.64)         | (1.66 - 1.6)          | (1.61 - 1.55)         | (1.60 - 1.54)         |
| R <sub>sym</sub> or R <sub>merge</sub> <sup>1</sup> | 0.0561 (1.57)         | 0.0565 (1.31)         | 0.0566 (1.01)         | 0.0339 (0.984)        |
| // $\sigma$ <sup>1</sup>                            | 21.7 (1.3)            | 24.7 (1.5)            | 24.3 (1.7)            | 34.5 (1.7)            |
| CC <sup>1/2</sup> <sup>1</sup>                      | 1 (0.51)              | 1 (0.59)              | 1 (0.59)              | 1 (0.61)              |
| Completeness (%)                                    | 99.7 (98.0)           | 100 (100)             | 99.0 (91.3)           | 99.5 (96.4)           |
| No. unique reflections <sup>1</sup>                 | 54007 (5291)          | 59684 (5958)          | 64446 (5924)          | 66491 (6416)          |
| <b>Refinement</b>                                   |                       |                       |                       |                       |
| Up primer occ.                                      | 1.00                  | 0.90                  | 0.85                  | 0.80                  |
| Down primer occ.                                    | -                     | 0.10                  | 0.15                  | 0.20                  |
| A site occupancy                                    | 0.20 K <sup>1+</sup>  | 0.75 Mg <sup>2+</sup> | 0.75 Mg <sup>2+</sup> | 0.80 Mg <sup>2+</sup> |
| B site occupancy                                    | 0.80 Ca <sup>2+</sup> | 1.00 Mg <sup>2+</sup> | 1.00 Mg <sup>2+</sup> | 1.00 Mg <sup>2+</sup> |
| dGTP occupancy                                      | 0.80                  | 0.80                  | 0.80                  | 0.85                  |
| <b>B-factors</b>                                    |                       |                       |                       |                       |
| Me <sub>A</sub> /Lig <sub>A</sub> <sup>2</sup>      | 28.5/33.7             | 33.0/37.3             | 24.5/33.4             | 38.6/35.7             |
| Me <sub>B</sub> /Lig <sub>B</sub> <sup>2</sup>      | 22.1/26.1             | 20.0/27.9             | 16.5/23.7             | 18.3/25.3             |
| Resolution (Å)                                      | 1.64                  | 1.60                  | 1.55                  | 1.54                  |
| No. reflections                                     | 54006 (5291)          | 59681 (5958)          | 64432 (5919)          | 66487 (6416)          |
| R <sub>work</sub> /R <sub>free</sub>                | 0.19/0.22             | 0.19/0.21             | 0.19/0.20             | 0.19/0.22             |
| Wilson B                                            | 27.7                  | 24.9                  | 21.9                  | 24.3                  |
| <b>Ramachandran</b>                                 |                       |                       |                       |                       |
| Favored (%)                                         | 97.2                  | 97.7                  | 98.1                  | 97.7                  |
| Outlier (%)                                         | 0.23                  | 0                     | 0                     | 0                     |
| <b>R.m.s. deviations</b>                            |                       |                       |                       |                       |
| Bond lengths (Å)                                    | 0.008                 | 0.009                 | 0.009                 | 0.009                 |
| Bond angles (°)                                     | 1.3                   | 1.2                   | 1.1                   | 1.2                   |

<sup>1</sup>Data in the highest resolution shell is shown in the parenthesis.

<sup>2</sup>B-factor of metal ions and their protein nucleotide ligands.

|                                                     | 0.4                   | 1                     | 2                     |
|-----------------------------------------------------|-----------------------|-----------------------|-----------------------|
| <b>PDB Code</b>                                     | <b>7U7V</b>           | <b>7U7W</b>           | <b>7U7X</b>           |
| <b>Data collection</b>                              |                       |                       |                       |
| Wavelength (Å)                                      | 0.9786                | 0.9786                | 0.9786                |
| Space group                                         | <i>P6<sub>1</sub></i> | <i>P6<sub>1</sub></i> | <i>P6<sub>1</sub></i> |
| Cell dimensions                                     |                       |                       |                       |
| <i>a, b, c</i> (Å)                                  | 98.62                 | 97.97                 | 98.29                 |
|                                                     | 98.62                 | 97.97                 | 98.29                 |
|                                                     | 81.96                 | 81.76                 | 81.95                 |
| $\alpha, \beta, \gamma$ (°)                         | 90, 90, 120           | 90, 90, 120           | 90, 90, 120           |
| Resolution (Å) <sup>1</sup>                         | 37.9 - 1.65           | 37.7 - 1.66           | 28.4 - 1.65           |
|                                                     | (1.71 - 1.65)         | (1.72 - 1.66)         | (1.71 - 1.65)         |
| R <sub>sym</sub> or R <sub>merge</sub> <sup>1</sup> | 0.0691 (1.74)         | 0.0581 (1.24)         | 0.0614 (1.25)         |
| // $\sigma$ <sup>1</sup>                            | 19.8 (1.4)            | 26.7 (1.8)            | 23.2 (1.7)            |
| CC <sup>1/2</sup> <sup>1</sup>                      | 1 (0.55)              | 1 (0.61)              | 1 (0.62)              |
| Completeness (%)                                    | 100 (99.7)            | 97.9 (95.0)           | 99.2 (98.1)           |
| No. unique reflections <sup>1</sup>                 | 54421 (5435)          | 51398 (4967)          | 53665 (5308)          |
| <b>Refinement</b>                                   |                       |                       |                       |
| Up primer occ.                                      | 0.90                  | 0.85                  | 0.95                  |
| Down primer occ.                                    | 0.10                  | 0.15                  | 0.05                  |
| A site occupancy                                    | 1.00 Mg <sup>2+</sup> | 1.00 Mg <sup>2+</sup> | 1.00 Mg <sup>2+</sup> |
| B site occupancy                                    | 1.00 Mg <sup>2+</sup> | 0.90 Mg <sup>2+</sup> | 0.90 Mg <sup>2+</sup> |
| dGTP occupancy                                      | 0.80                  | 0.85                  | 0.80                  |
| B-factors                                           |                       |                       |                       |
| Me <sub>A</sub> /Lig <sub>A</sub> <sup>2</sup>      | 25.22/30.3            | 23.6/29.0             | 23.3/27.1             |
| Me <sub>B</sub> /Lig <sub>B</sub> <sup>2</sup>      | 20.7/24.3             | 19.2/23.8             | 18.9/22.5             |
| Resolution (Å)                                      | 1.65                  | 1.66                  | 1.65                  |
| No. reflections                                     | 54419 (5435)          | 51387 (4965)          | 53662 (5308)          |
| R <sub>work</sub> /R <sub>free</sub>                | 0.19/0.22             | 0.18/0.21             | 0.19/0.21             |
| Wilson B                                            | 26.3                  | 25.8                  | 26.1                  |
| Ramachandran                                        |                       |                       |                       |
| Favored (%)                                         | 97.4                  | 97.7                  | 97.2                  |
| Outlier (%)                                         | 0.23                  | 0.47                  | 0.23                  |
| R.m.s. deviations                                   |                       |                       |                       |
| Bond lengths (Å)                                    | 0.009                 | 0.009                 | 0.009                 |
| Bond angles (°)                                     | 1.2                   | 1.3                   | 1.2                   |

<sup>1</sup>Data in the highest resolution shell is shown in the parenthesis.

<sup>2</sup>B-factor of metal ions and their protein nucleotide ligands.

f A-site titration with Mn<sup>2+</sup>

|                                                     | 0.06                  | 0.12                  | 0.25                  | 0.5                   |
|-----------------------------------------------------|-----------------------|-----------------------|-----------------------|-----------------------|
| <b>PDB Code</b>                                     | <b>7U7Y</b>           | <b>7U7Z</b>           | <b>7U80</b>           | <b>7U81</b>           |
| <b>Data collection</b>                              |                       |                       |                       |                       |
| Wavelength (Å)                                      | 0.9786                | 0.9786                | 0.9786                | 0.9786                |
| Space group                                         | <i>P6<sub>1</sub></i> | <i>P6<sub>1</sub></i> | <i>P6<sub>1</sub></i> | <i>P6<sub>1</sub></i> |
| Cell dimensions                                     |                       |                       |                       |                       |
| <i>a, b, c</i> (Å)                                  | 98.61                 | 98.22                 | 98.73                 | 98.31                 |
|                                                     | 98.61                 | 98.22                 | 98.73                 | 98.31                 |
|                                                     | 81.80                 | 82.16                 | 82.03                 | 82.09                 |
| $\alpha, \beta, \gamma$ (°)                         | 90, 90, 120           | 90, 90, 120           | 90, 90, 120           | 90, 90, 120           |
| Resolution (Å) <sup>1</sup>                         | 42.7 - 1.78           | 37.8 - 1.67           | 42.3 - 1.83           | 42.6 - 1.6            |
|                                                     | (1.84 - 1.78)         | (1.73 - 1.67)         | (1.90 - 1.83)         | (1.66 - 1.6)          |
| R <sub>sym</sub> or R <sub>merge</sub> <sup>1</sup> | 0.0781 (1.74)         | 0.0594 (1.60)         | 0.1 (1.76)            | 0.0552 (1.43)         |
| <i>I</i> / $\sigma$ <sup>1</sup>                    | 19.3 (1.4)            | 23.0 (1.4)            | 12.9 (1.2)            | 24.4 (1.4)            |
| CC <sup>1/2</sup> <sup>1</sup>                      | 1 (0.59)              | 1 (0.56)              | 1 (0.59)              | 1 (0.50)              |
| Completeness (%)                                    | 100 (100)             | 100 (99.9)            | 99.8 (98.6)           | 99.8 (99.2)           |
| No. unique reflections <sup>1</sup>                 | 43307 (4269)          | 52212 (5189)          | 40035 (3935)          | 59314 (5852)          |
| <b>Refinement</b>                                   |                       |                       |                       |                       |
| Up primer occ.                                      | 0.75                  | 0.75                  | 0.65                  | 0.65                  |
| Down primer occ.                                    | 0.25                  | 0.25                  | 0.35                  | 0.35                  |
| A site occupancy                                    | 0.60 Mn <sup>2+</sup> | 0.65 Mn <sup>2+</sup> | 0.70 Mn <sup>2+</sup> | 0.80 Mn <sup>2+</sup> |
| B site occupancy                                    | 0.85 Mn <sup>2+</sup> | 0.85 Mn <sup>2+</sup> | 0.85 Mn <sup>2+</sup> | 0.90 Mn <sup>2+</sup> |
| dGTP occupancy                                      | 0.85                  | 0.85                  | 0.85                  | 0.90                  |
| <b>B-factors</b>                                    |                       |                       |                       |                       |
| Me <sub>A</sub> /Lig <sub>A</sub> <sup>2</sup>      | 31.6/33.6             | 31.5/33.2             | 29.5/30.9             | 22.6/25.7             |
| Me <sub>B</sub> /Lig <sub>B</sub> <sup>2</sup>      | 29.2/25.5             | 27.2/26.3             | 27.7/26.0             | 21.4/22.2             |
| Resolution (Å)                                      | 1.78                  | 1.67                  | 1.83                  | 1.60                  |
| No. reflections                                     | 43305 (4269)          | 52211 (5189)          | 40033 (3935)          | 59306 (5852)          |
| R <sub>work</sub> /R <sub>free</sub>                | 0.18/0.21             | 0.19/0.22             | 0.18/0.21             | 0.19/0.22             |
| Wilson B                                            | 29.8                  | 27.0                  | 33.0                  | 24.3                  |
| <b>Ramachandran</b>                                 |                       |                       |                       |                       |
| Favored (%)                                         | 97.9                  | 97.9                  | 98.1                  | 98.1                  |
| Outlier (%)                                         | 0                     | 0                     | 0.23                  | 0                     |
| <b>R.m.s. deviations</b>                            |                       |                       |                       |                       |
| Bond lengths (Å)                                    | 0.009                 | 0.01                  | 0.009                 | 0.009                 |
| Bond angles (°)                                     | 1.2                   | 1.2                   | 1.2                   | 1.2                   |

<sup>1</sup>Data in the highest resolution shell is shown in the parenthesis.

<sup>2</sup>B-factor of metal ions and their protein nucleotide ligands.



|                                                     | 1                     | 3                     | 6                     |
|-----------------------------------------------------|-----------------------|-----------------------|-----------------------|
| <b>PDB Code</b>                                     | <b>7U82</b>           | <b>7U83</b>           | <b>7U84</b>           |
| <b>Data collection</b>                              |                       |                       |                       |
| Wavelength (Å)                                      | 0.9787                | 0.9787                | 0.9787                |
| Space group                                         | <i>P6<sub>1</sub></i> | <i>P6<sub>1</sub></i> | <i>P6<sub>1</sub></i> |
| Cell dimensions                                     |                       |                       |                       |
| <i>a, b, c</i> (Å)                                  | 98.00                 | 98.27                 | 97.85                 |
|                                                     | 98.00                 | 98.27                 | 97.85                 |
|                                                     | 81.70                 | 81.95                 | 81.55                 |
| $\alpha, \beta, \gamma$ (°)                         | 90, 90, 120           | 90, 90, 120           | 90, 90, 120           |
| Resolution (Å) <sup>1</sup>                         | 37.7 - 1.55           | 37.8 - 1.55           | 37.6 - 1.71           |
|                                                     | (1.61 - 1.55)         | (1.61 - 1.55)         | (1.77 - 1.71)         |
| R <sub>sym</sub> or R <sub>merge</sub> <sup>1</sup> | 0.0538 (1.2)          | 0.0546 (1.33)         | 0.0772 (1.77)         |
| // $\sigma$ <sup>1</sup>                            | 21.5 (1.4)            | 22.2 (1.2)            | 17.0 (1.3)            |
| CC <sup>1/2</sup> <sup>1</sup>                      | 1 (0.55)              | 1 (0.49)              | 1 (0.57)              |
| Completeness (%)                                    | 99.8 (97.7)           | 99.8 (97.9)           | 100 (99.8)            |
| No. unique reflections <sup>1</sup>                 | 64396 (6272)          | 64591 (6331)          | 47935 (4771)          |
| <b>Refinement</b>                                   |                       |                       |                       |
| Up primer occ.                                      | 0.70                  | 0.65                  | 0.60                  |
| Down primer occ.                                    | 0.30                  | 0.35                  | 0.40                  |
| A site occupancy                                    | 0.85 Mn <sup>2+</sup> | 0.95 Mn <sup>2+</sup> | 1.00 Mn <sup>2+</sup> |
| B site occupancy                                    | 0.90 Mn <sup>2+</sup> | 1.00 Mn <sup>2+</sup> | 1.00 Mn <sup>2+</sup> |
| dGTP occupancy                                      | 0.90                  | 0.95                  | 1.00                  |
| B-factors                                           |                       |                       |                       |
| Me <sub>A</sub> /Lig <sub>A</sub> <sup>2</sup>      | 19.9/23.9             | 24.7/25.8             | 24.6/24.7             |
| Me <sub>B</sub> /Lig <sub>B</sub> <sup>2</sup>      | 20.5/21.9             | 22.7/23.2             | 23.3/23.2             |
| Resolution (Å)                                      | 1.55                  | 1.55                  | 1.71                  |
| No. reflections                                     | 64394 (6271)          | 64586 (6331)          | 47924 (4768)          |
| R <sub>work</sub> /R <sub>free</sub>                | 0.19/0.22             | 0.19/0.23             | 0.18/0.24             |
| Wilson B                                            | 24.5                  | 25.2                  | 30.3                  |
| Ramachandran                                        |                       |                       |                       |
| Favored (%)                                         | 98.1                  | 98.1                  | 97.9                  |
| Outlier (%)                                         | 0.23                  | 0.23                  | 0.23                  |
| R.m.s. deviations                                   |                       |                       |                       |
| Bond lengths (Å)                                    | 0.009                 | 0.009                 | 0.009                 |
| Bond angles (°)                                     | 1.2                   | 1.2                   | 1.1                   |

<sup>1</sup>Data in the highest resolution shell is shown in the parenthesis.

<sup>2</sup>B-factor of metal ions and their protein nucleotide ligands.
