# Supplementary material for: In crystallo observation of three metal ion promoted DNA polymerase misincorporation
Source: PubMed Central journal article supplement (PMC9054841; doi:10.1038/s41467-022-30005-3), 2022-04-29
Supplement: 41467_2022_30005_MOESM2_ESM.pdf [file 41467_2022_30005_MOESM2_ESM.pdf]

### **Description of Additional Supplementary Files**

File Name: Supplementary Movie 1

Description: Cinematic visual of the in crystallo reaction of Pol  $\eta$  misincorporation.

The first 4 seconds were not observed in our study and are theoretical.
